# Supplementary material
Source: publisher figshare collection journal article supplement (https://acs.figshare.com/ndownloader/files/4106059)

## **SUPPORTING INFORMATION**

### **New Insights into the Preparation of the Low-Melting Polymorph of Racemic Ibuprofen**

P. Andrew Williams, Colan E. Hughes and Kenneth D. M. Harris\*

School of Chemistry, Cardiff University, Park Place, Cardiff CF10 3AT, Wales, U.K.

# DSC Data for Experiment A (see Table 1 of paper)

Mass of sample = 4.9 mg

Sample: Ibuprofen  
Size: 4.9000 mg  
Method: Ibu\_1  
Comment: Ibuprofen melt/quench run 1

DSC

File: C:\Data\Ibuprofen\DSC\Andrew\IBU.001  
Operator: Andrew  
Run Date: 14-Dec-2011 11:11  
Instrument: DSC Q100 V9.9 Build 303

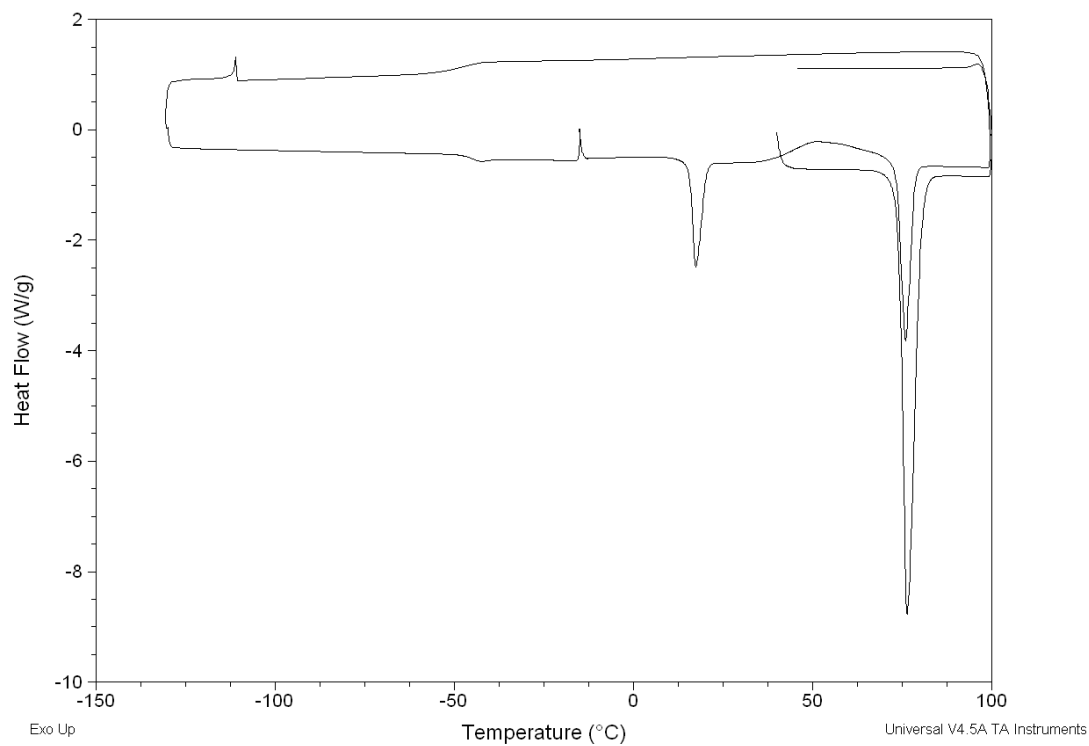

## DSC Data for Experiment B (see Table 1 of paper)

Mass of sample = 3.5 mg

Sample: Ibuprofen  
Size: 3.5000 mg  
Method: Ibu\_1  
Comment: Ibuprofen melt/quench repeat PAW run 6

DSC

File: C:\Data\Ibuprofen\DSC\Colan\IBU.002  
Operator: Colan  
Run Date: 19-Dec-2011 12:01  
Instrument: DSC Q100 V9.9 Build 303

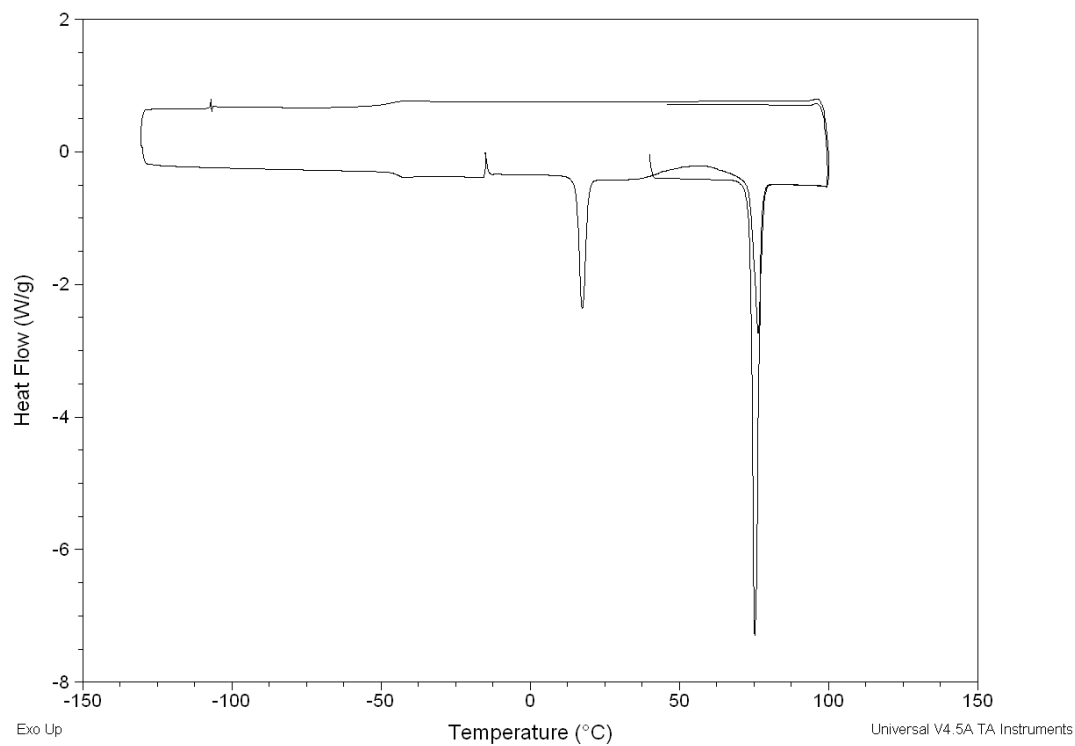

# DSC Data for Experiment C (see Table 1 of paper)

Mass of sample = 3.4 mg

Sample: Ibuprofen  
Size: 3.4000 mg  
Method: Ibu\_1  
Comment: Ibuprofen melt/quench run 6

DSC

File: C:\Data\Ibuprofen\DSC\Andrew\IBU.006  
Operator: Andrew  
Run Date: 15-Dec-2011 14:30  
Instrument: DSC Q100 V9.9 Build 303

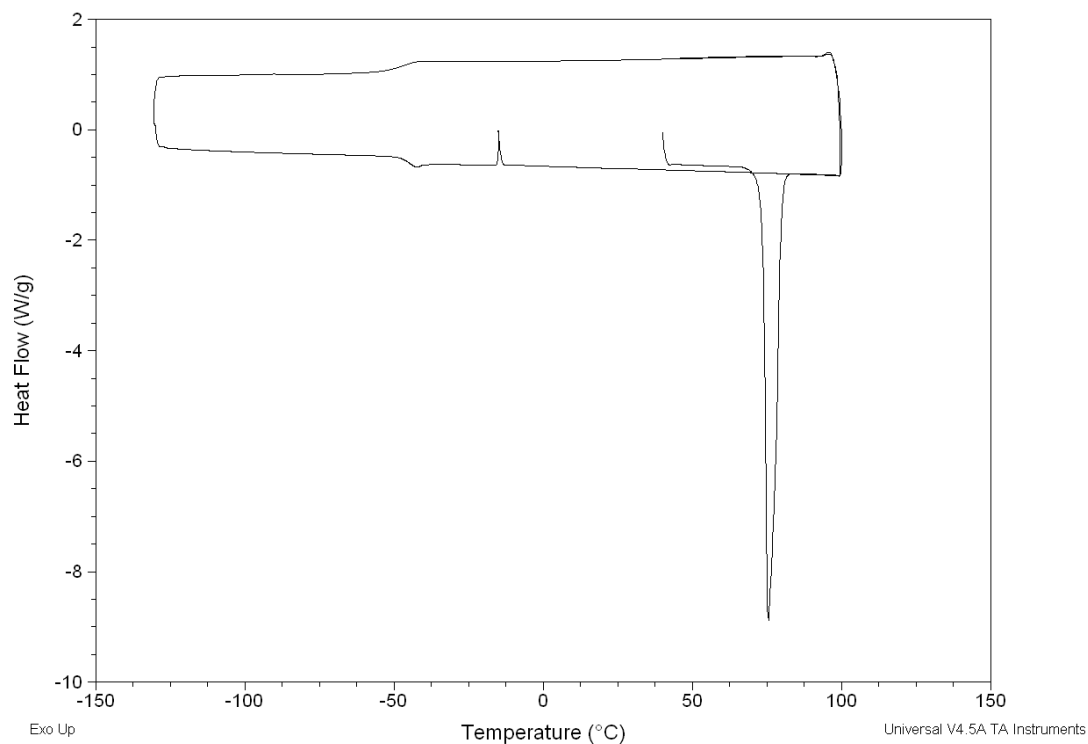

# DSC Data for Experiment D (see Table 1 of paper)

Mass of sample = 3.6 mg

Sample: Ibuprofen  
Size: 3.6000 mg  
Method: Ibu\_1  
Comment: Ibuprofen melt - glass - anneal - warm

DSC

File: C:\Data\Ibuprofen\DSC\Colan\IBU.004  
Operator: Colan  
Run Date: 20-Dec-2011 12:06  
Instrument: DSC Q100 V9.9 Build 303

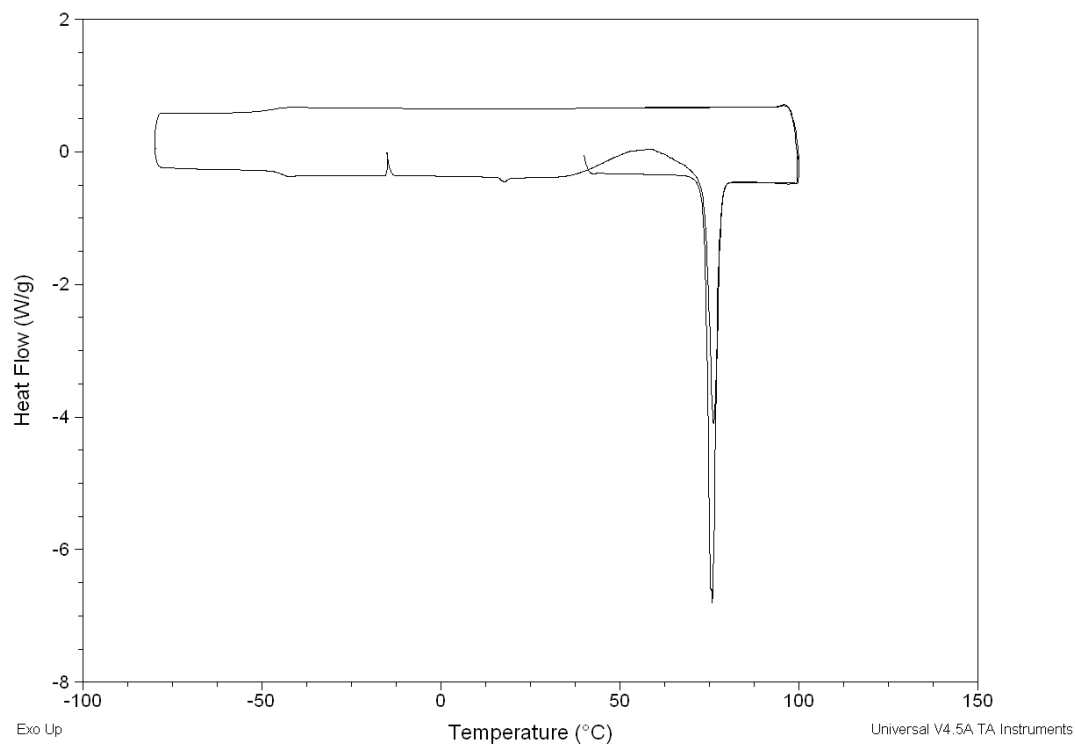

# DSC Data for Experiment E (see Table 1 of paper)

Mass of sample = 3.7 mg

Sample: Ibuprofen  
Size: 3.7000 mg  
Method: Ibu\_1  
Comment: Ibuprofen melt - anneal - warm

DSC

File: C:\...\Data\Ibuprofen\DSC\Colan\IBU.008  
Operator: Andrew  
Run Date: 12-Jan-2012 10:15  
Instrument: DSC Q100 V9.9 Build 303

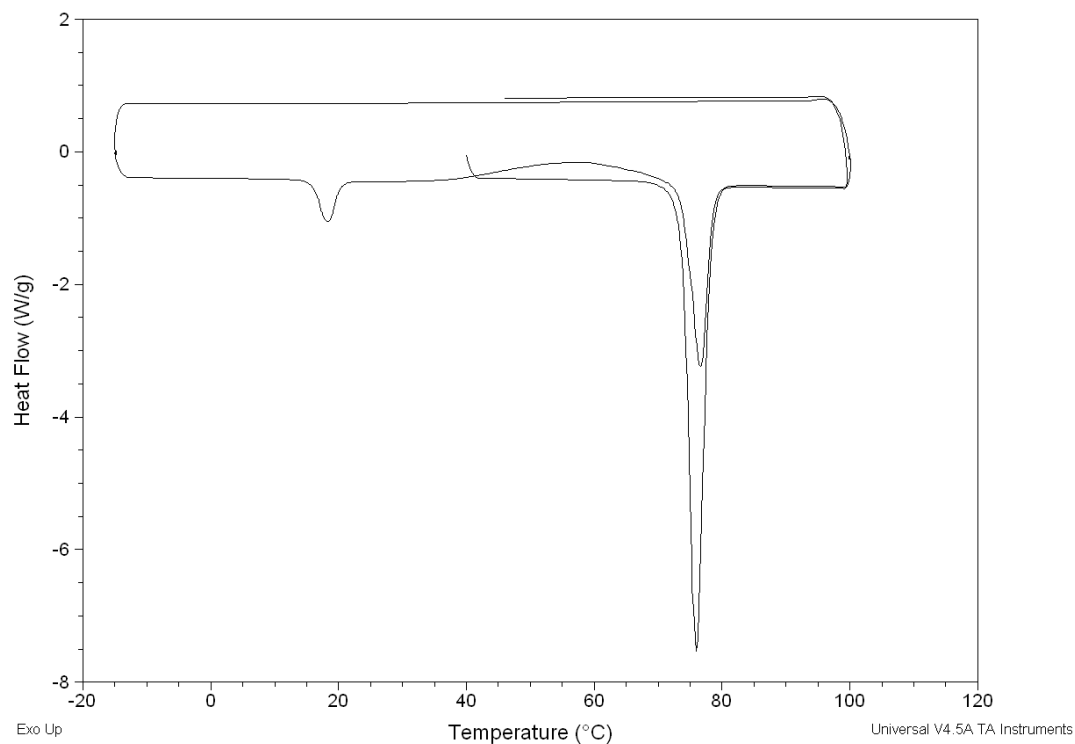

# DSC Data for Experiment F (see Table 1 of paper)

Mass of sample = 3.4 mg

Sample: Ibuprofen  
Size: 3.4000 mg  
Method: Ibu\_1  
Comment: Ibuprofen melt/quench run 7

DSC

File: C:\Data\Ibuprofen\DSC\Andrew\IBU.007  
Operator: Andrew  
Run Date: 16-Dec-2011 10:52  
Instrument: DSC Q100 V9.9 Build 303

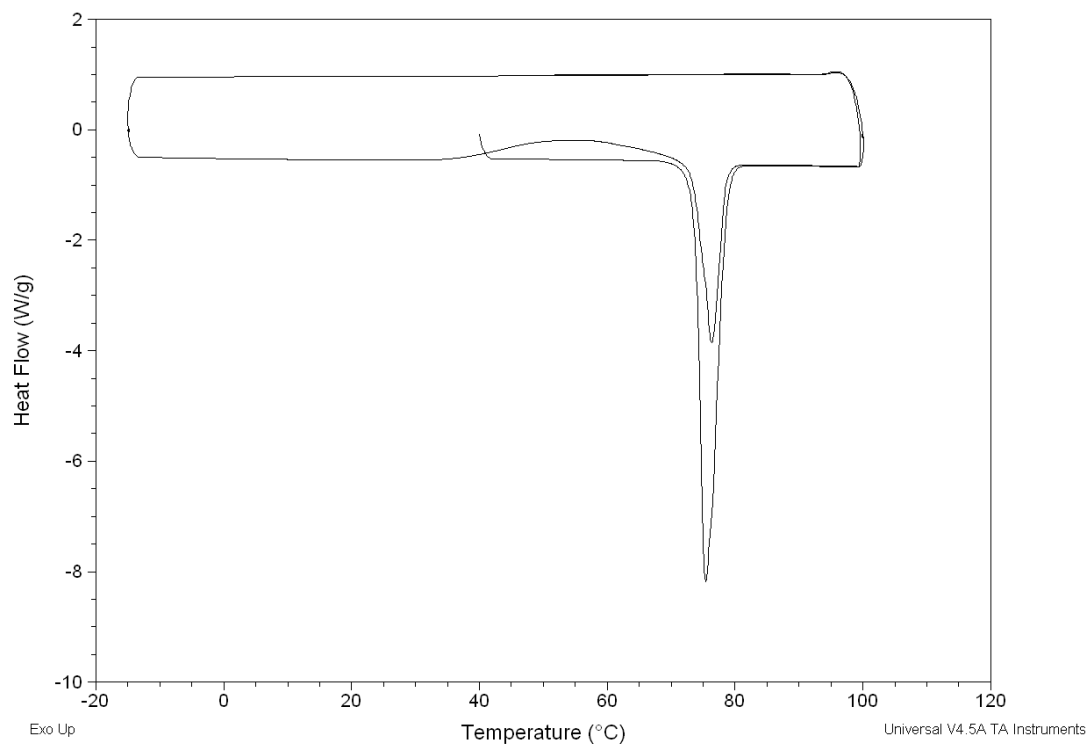

## DSC Data for Experiment G (see Table 1 of paper)

Mass of sample = 3.9 mg

Sample: Ibuprofen  
Size: 3.9000 mg  
Method: Ibu\_1  
Comment: Ibuprofen melt - glass - anneal - warm

DSC

File: C:\...\Data\Ibuprofen\DSC\Andrew\IBU.008  
Operator: Andrew  
Run Date: 05-Jan-2012 11:35  
Instrument: DSC Q100 V9.9 Build 303

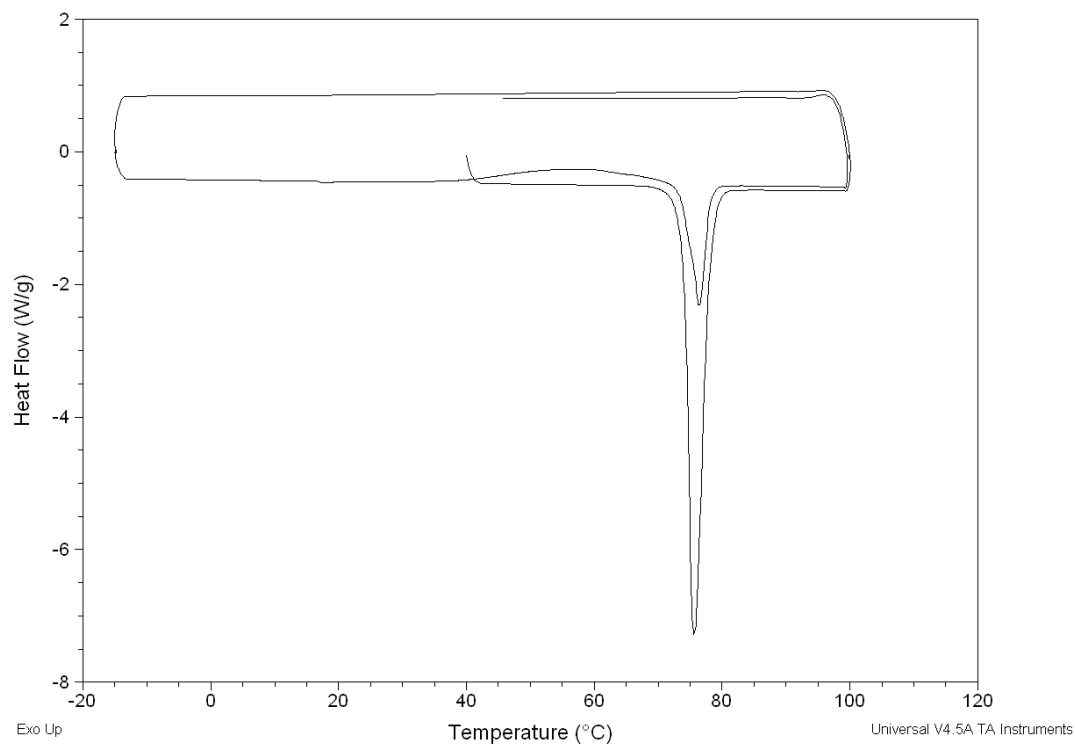

## DSC Data for Experiment H (see Table 1 of paper)

Mass of sample = 3.2 mg

Sample: Ibuprofen  
Size: 3.2000 mg  
Method: Ibu\_1  
Comment: Ibuprofen melt - anneal - warm

DSC

File: C:\...\Data\Ibuprofen\DSC\Colan\IBU.006  
Operator: Andrew  
Run Date: 11-Jan-2012 12:51  
Instrument: DSC Q100 V9.9 Build 303

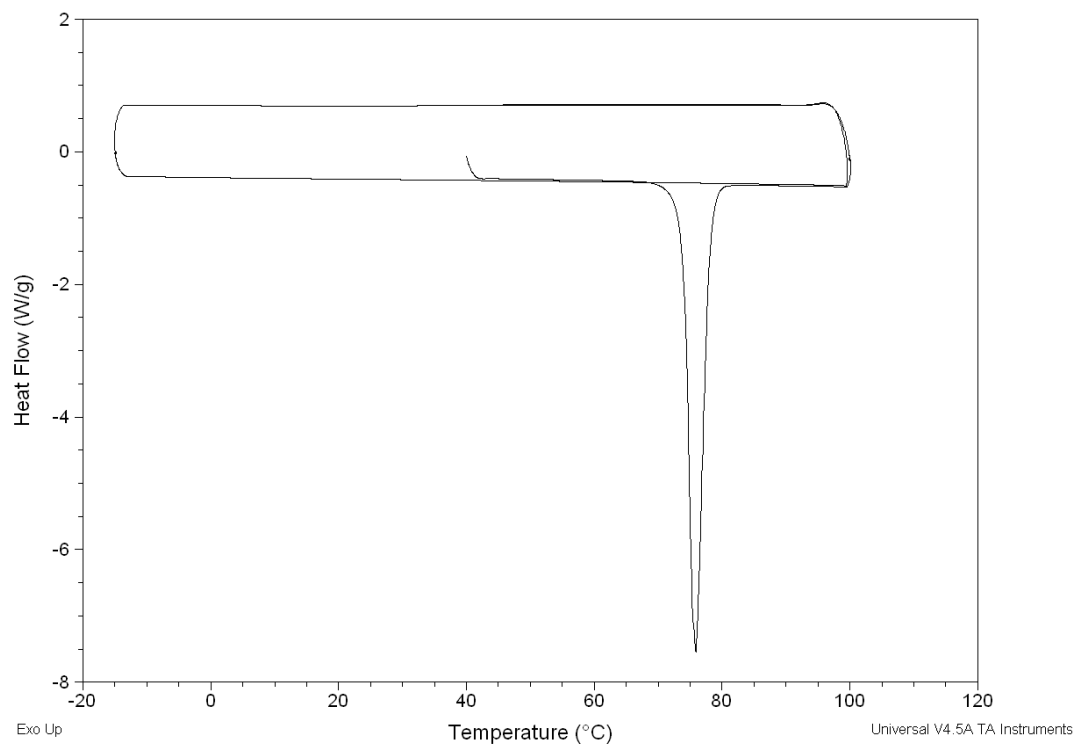

## DSC Data for Experiment I (see Table 1 of paper)

Mass of sample = 3.4 mg

Sample: Ibuprofen  
Size: 3.4000 mg  
Method: Ibu\_1  
Comment: Ibuprofen melt - anneal - warm

DSC

File: C:\...Data\Ibuprofen\DSC\Colan\IBU.007  
Operator: Andrew  
Run Date: 11-Jan-2012 14:27  
Instrument: DSC Q100 V9.9 Build 303

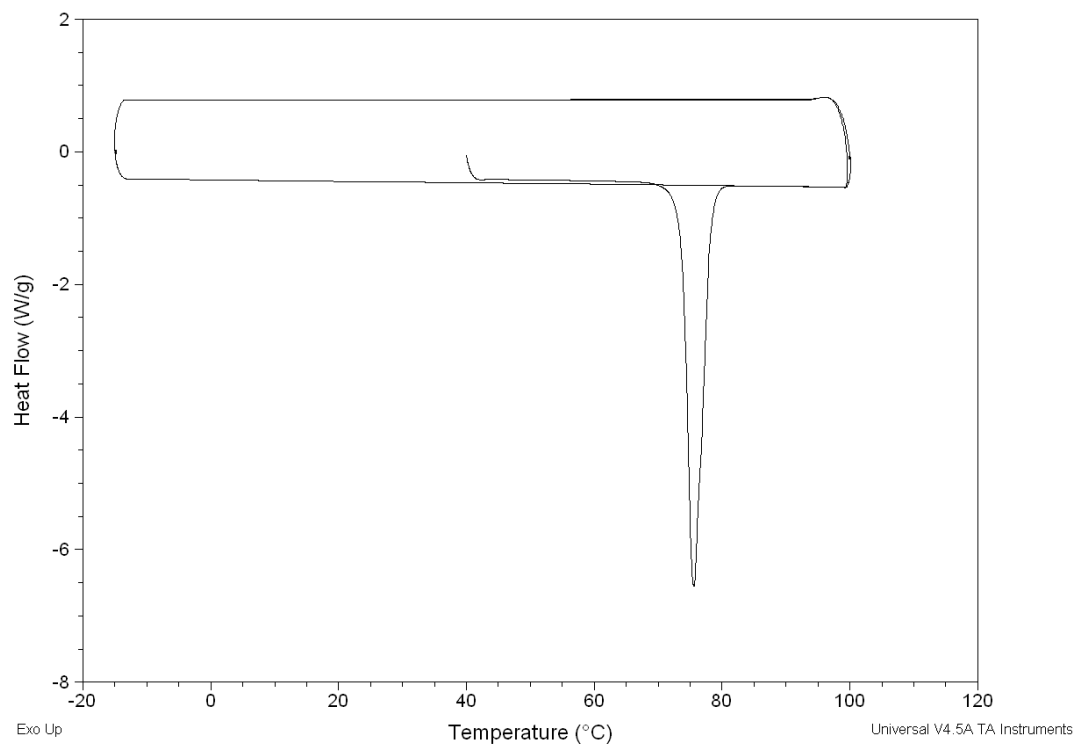

## DSC Data for Experiment J (see Table 1 of paper)

Mass of sample = 3.5 mg

Sample: Ibuprofen  
Size: 3.5000 mg  
Method: Ibu\_1  
Comment: Ibuprofen melt - anneal - warm

DSC

File: C:\...\Data\Ibuprofen\DSC\Colan\IBU.010  
Operator: Andrew  
Run Date: 17-Jan-2012 12:27  
Instrument: DSC Q100 V9.9 Build 303

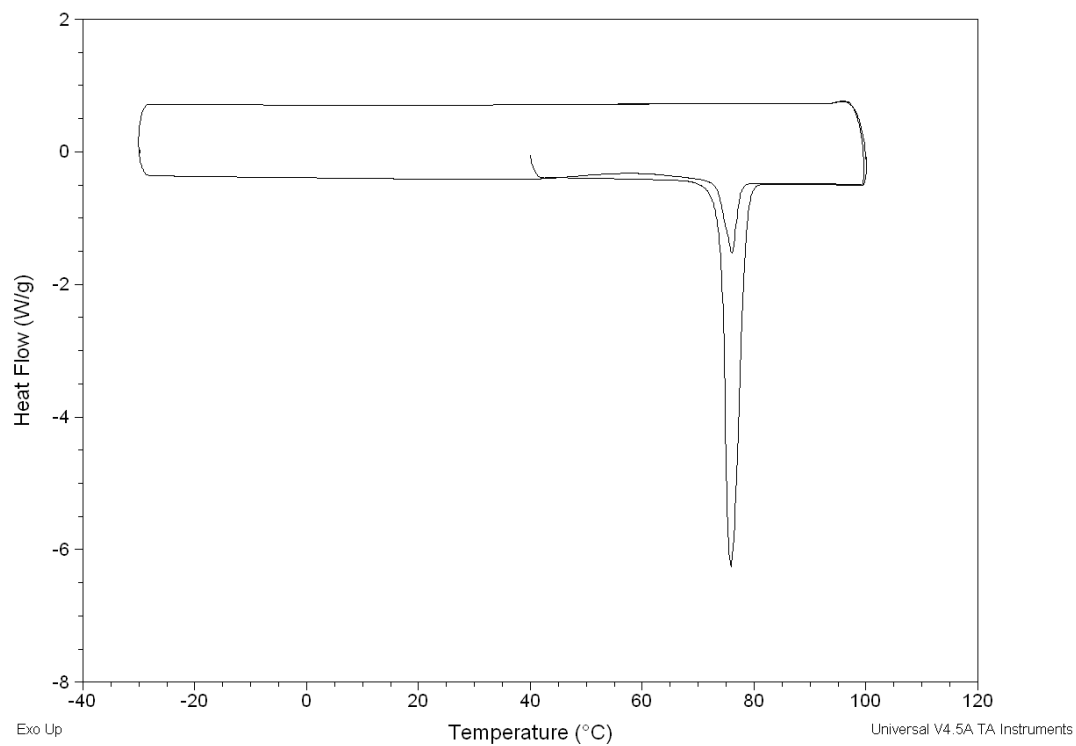

# DSC Data for Experiment K (see Table 1 of paper)

Mass of sample = 3.7 mg

Sample: Ibuprofen  
Size: 3.7000 mg  
Method: Ibu\_1  
Comment: Ibuprofen melt - anneal - warm

DSC

File: C:\...Data\Ibuprofen\DSC\Colan\IBU.011  
Operator: Andrew  
Run Date: 17-Jan-2012 16:17  
Instrument: DSC Q100 V9.9 Build 303

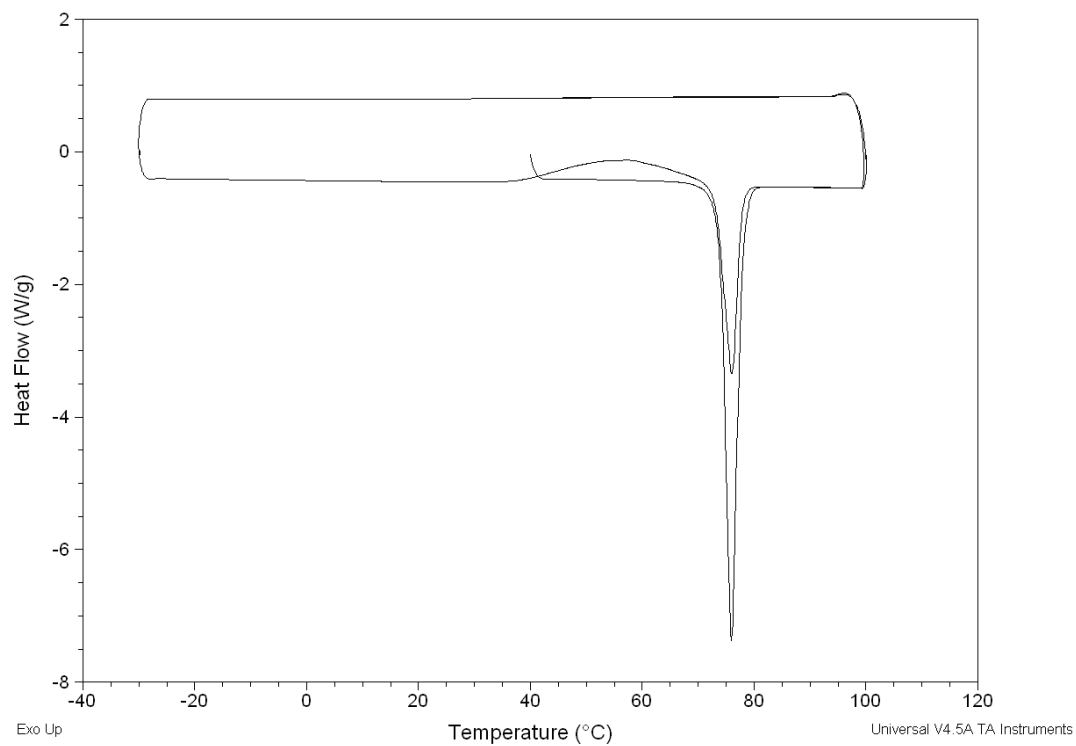

# DSC Data for Experiment L (see Table 1 of paper)

Mass of sample = 3.7 mg

Sample: Ibuprofen  
Size: 3.7000 mg  
Method: Ibu\_1  
Comment: Ibuprofen melt - anneal - warm

DSC

File: C:\Data\Ibuprofen\DSC\Colan\IBU.009  
Operator: Andrew  
Run Date: 16-Jan-2012 14:37  
Instrument: DSC Q100 V9.9 Build 303

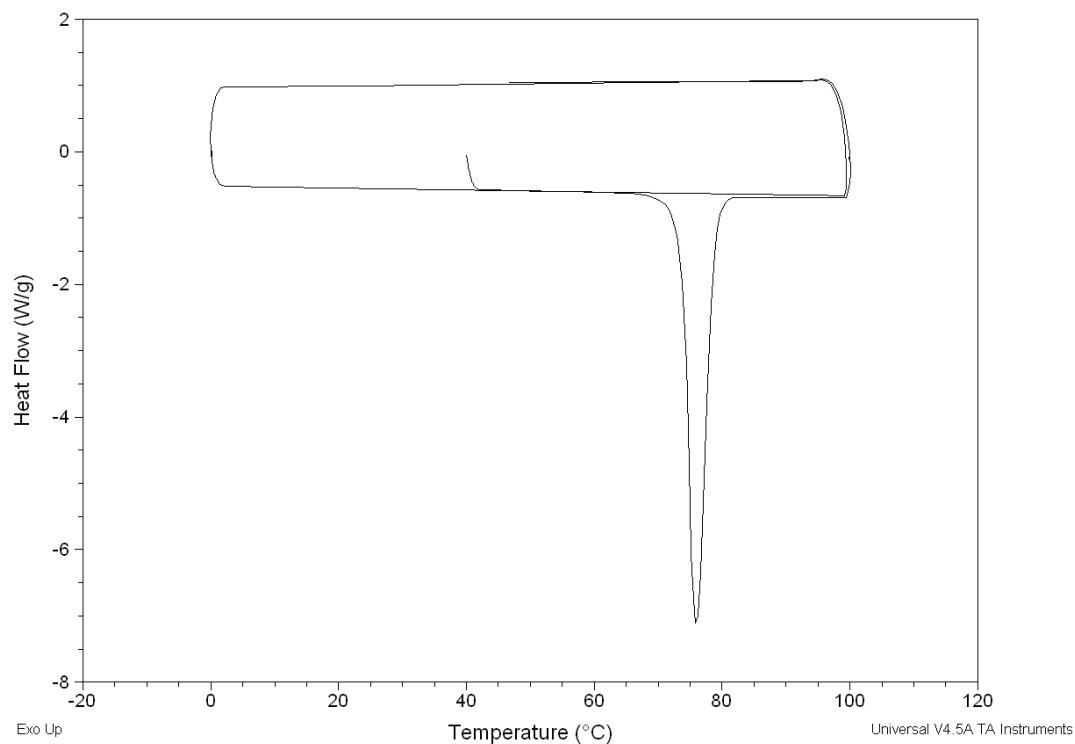

## DSC Data for Experiment M (see Table 1 of paper)

Mass of sample = 3.5 mg

Sample: Ibuprofen  
Size: 3.5000 mg  
Method: Ibu\_1  
Comment: Ibuprofen melt - anneal - warm

DSC

File: C:\...\Data\Ibuprofen\DSC\Andrew\IBU.009  
Operator: Andrew  
Run Date: 06-Jan-2012 13:29  
Instrument: DSC Q100 V9.9 Build 303

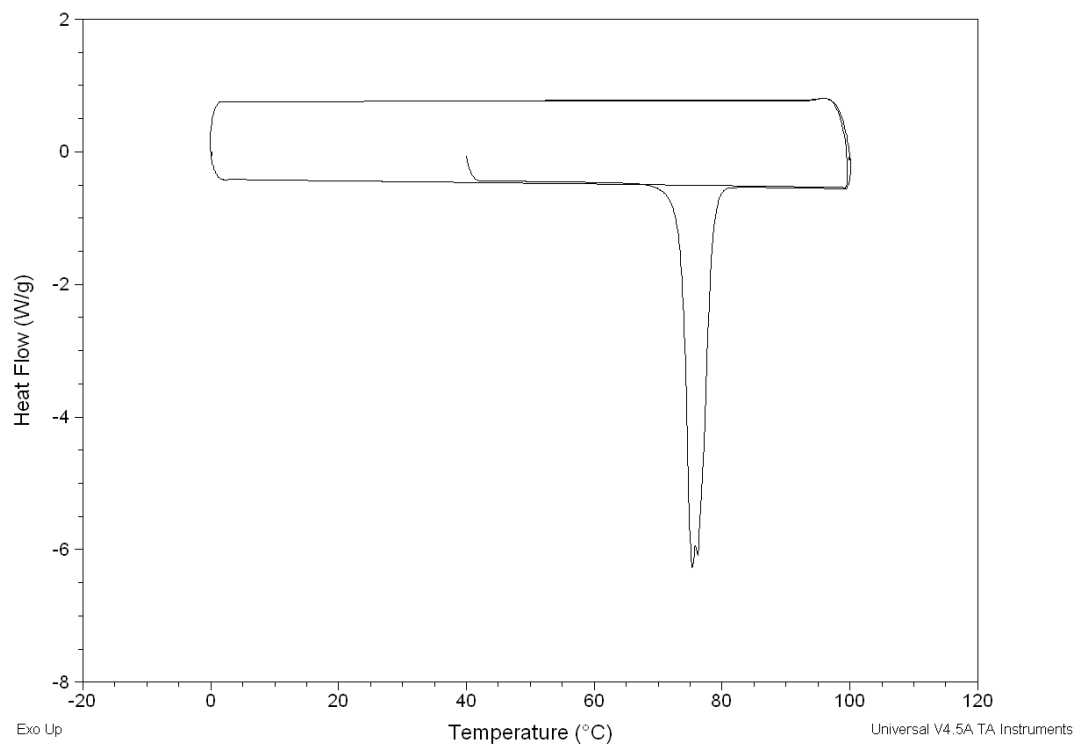

# DSC Data for Experiment N (see Table 1 of paper)

Mass of sample = 3.5 mg

Sample: Ibuprofen  
Size: 3.5000 mg  
Method: Ibu\_1  
Comment: Ibuprofen melt - anneal - warm

DSC

File: C:\Data\Ibuprofen\DSC\Colan\IBU.005  
Operator: Andrew  
Run Date: 10-Jan-2012 10:56  
Instrument: DSC Q100 V9.9 Build 303

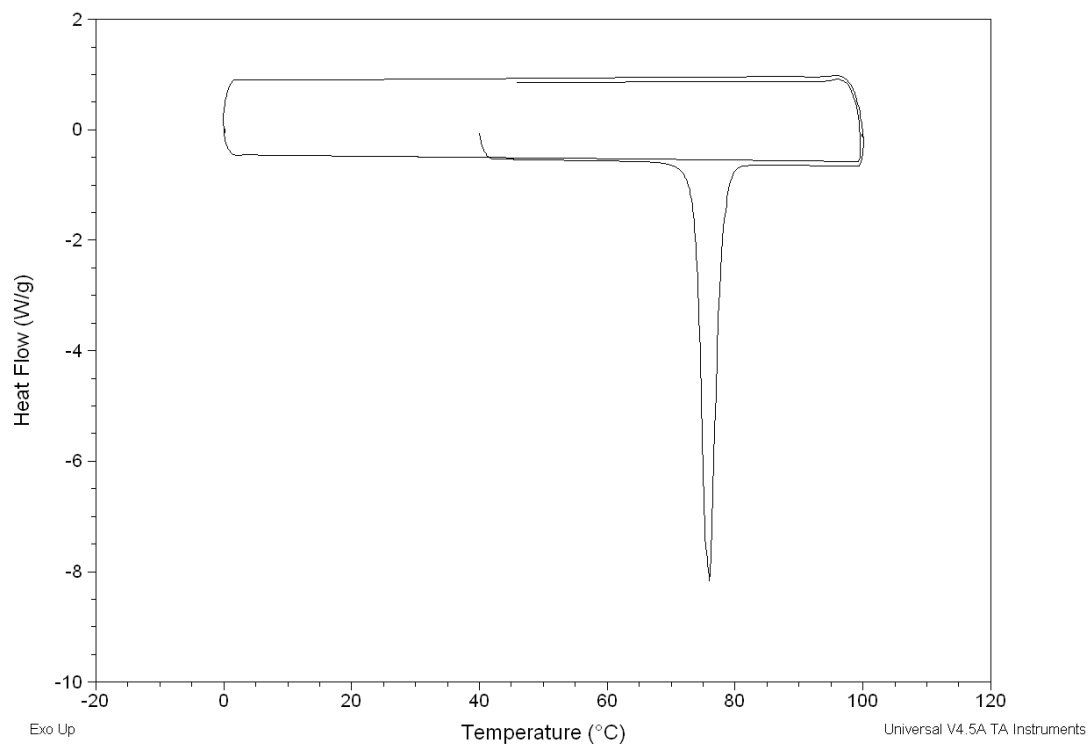

Supplement: Supplementary file 1 [file 4106059]
